# Supplementary material for: Cripto is essential to capture mouse epiblast stem cell and human embryonic stem cell pluripotency
Source: PubMed Central journal article supplement (PMC5025790; doi:10.1038/ncomms12589), 2016-09-02
Supplement: ncomms12589-s1.pdf [file ncomms12589-s1.pdf]

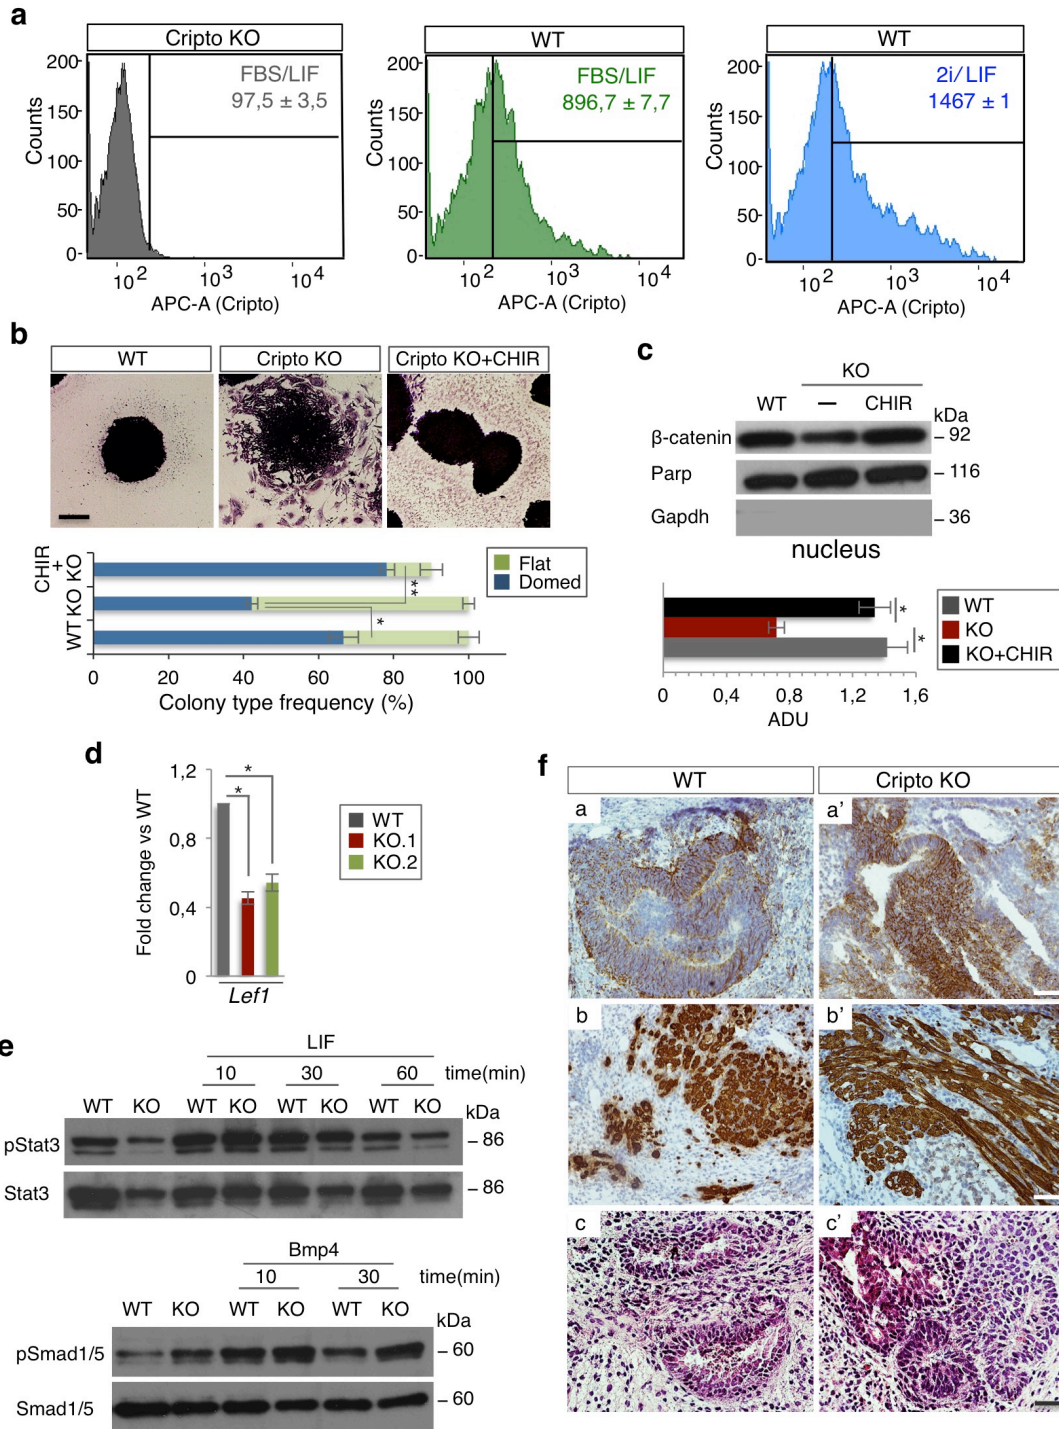

Supplementary Fig. 1

**Supplementary Figure 1. Cripto regulates ESC self-renewal.**

(a) Representative FACS plots showing Cripto expression in serum/LIF ESCs (green) and 2i LIF ESCs (blue). Cripto KO ESCs were used as negative control (dark grey). Data are shown as mean of fluorescence intensity and are expressed as mean±s.e.m. ( $n=2$ ). (b) Representative pictures (scale bar, 100µm) of crystal violet-stained and colony-type frequency (domed *versus* flat) of colonies generated from WT, Cripto KO and Cripto KO+CHIR99021 (3 µM) ESCs, at day 6 after plating (~100 colonies scored/condition). Data are mean±s.e.m. ( $n=3$ ;  $*P<0.01$ ). (c) Western blot analysis of nuclear β-catenin in WT, Cripto KO and Cripto KO+CHIR ESCs. Parp and Gapdh were

used as quality control of subcellular fractionation. The densitometric analysis is expressed in arbitrary unit (ADU) as  $\beta$ -catenin/Parp. Data are mean $\pm$ s.e.m. ( $n=3$ ;  $*P<0.01$ ). (d) Q-PCR of *Lef1* expression in WT ESCs and two independent Cripto KO ESC clones. Data are expressed as fold change after normalization to *Gapdh*. Data are mean $\pm$ s.e.m. ( $n=3$ ;  $*P<0.01$ ). (e) Western blot analysis of WT and Cripto KO ESCs stimulated with LIF and Bmp4 at the indicated time points, by using pStat3 and pSmad1/5 antibodies. Stat3 and Smad1/5 antibodies were used as loading controls. (f) Immunohistochemistry analysis showing tissues deriving from ectoderm (nestin; a-a'), mesoderm (MF-20; b-b') (scale bars, 75 $\mu$ m) and H&E staining showing endoderm derivatives (glandular epithelial structures; c-c') (scale bar, 150 $\mu$ m).

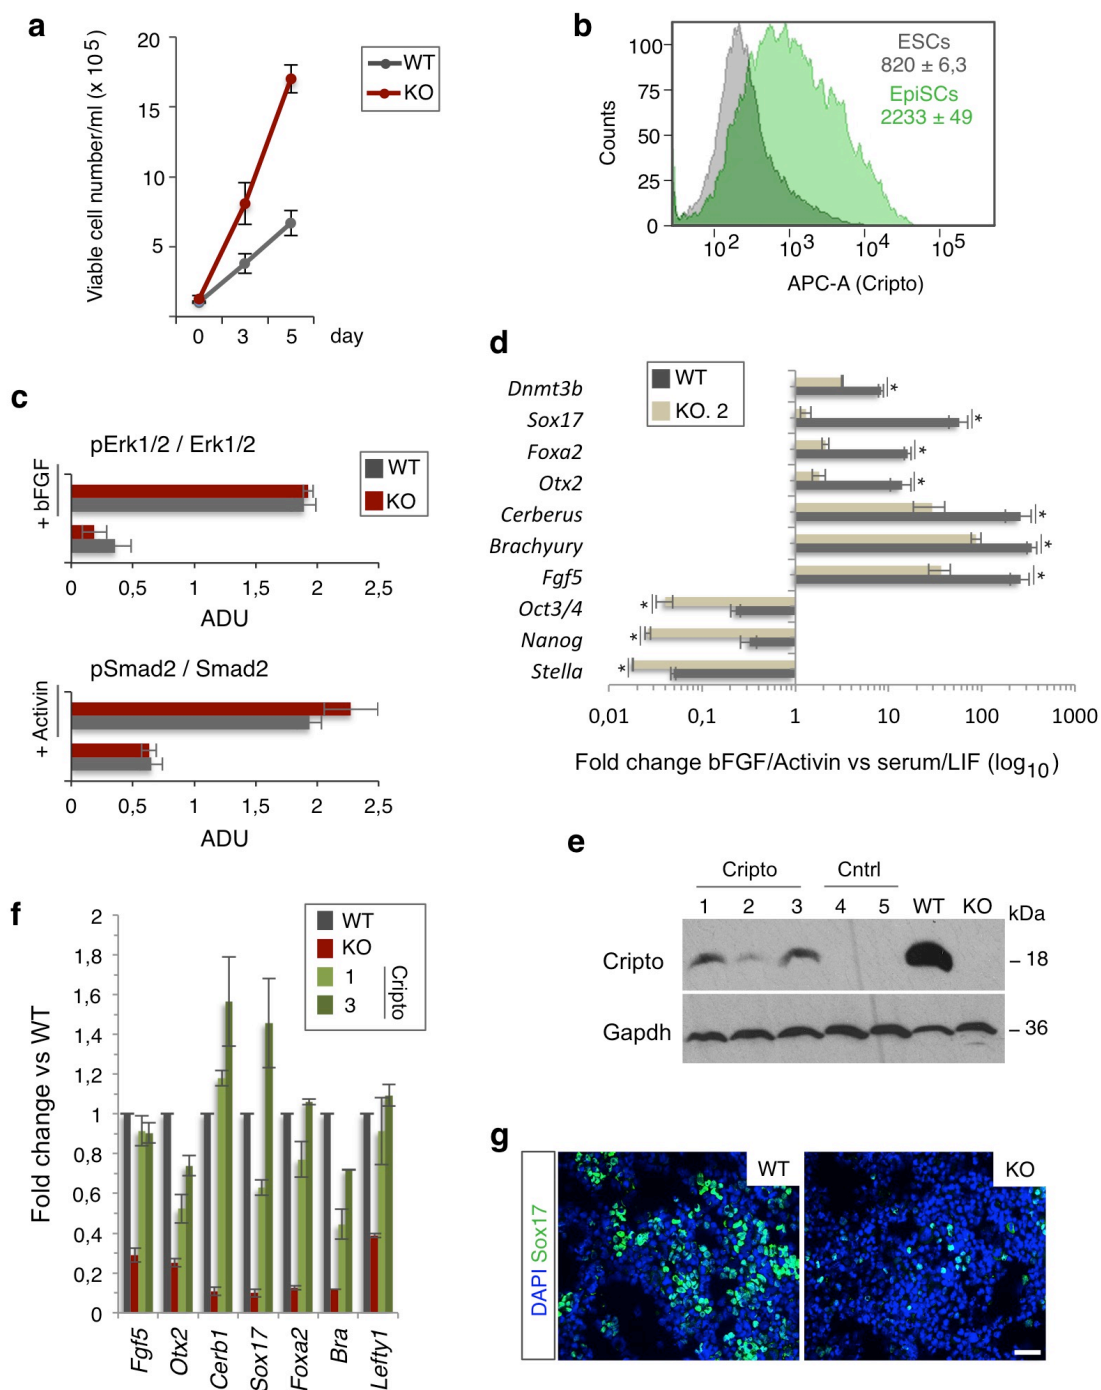

Supplementary Figure 2

### Supplementary Figure 2. Cripto controls ESC→EpiSC transition

(a) Automated cell counting of WT and Cripto KO ESC→EpiSC transition at different time points. (b) Representative FACS plots showing Cripto expression in serum/LIF ESCs (grey) and F/A EpiSCs (green). Data are shown as mean of fluorescence intensity and are expressed as mean±s.e.m. ( $n=2$ ). (c) Densitometric analysis of the Western Blot shown in Figure 2d expressed in arbitrary unit (ADU) as pErk1/2/Erk1/2 and pSmad2/Smad2 ratio. (d) Effect of F/A on the

expression of selected markers in WT and Cripto KO (clone KO.2) ESCs. Data are expressed as fold change of EpiSCs (F/A) vs ESCs (serum/LIF) after normalisation to *Gapdh*, and are mean $\pm$ s.e.m. ( $n=3$ ;  $*P<0.01$ ). (e) Western blot analysis of Cripto protein levels in three independent Cripto KO ESC clones transfected with mouse *Cripto* cDNA expression vector<sup>1</sup>. WT and Cripto KO ESCs were used as positive and negative control, respectively. *Gapdh* was used as a loading control. (f) Gene expression profiles of epiblast-associated markers in F/A -induced WT, Cripto KO and *Cripto* overexpressing cells. Data are expressed as fold change compared to F/A WT EpiSCs after normalization to *Gapdh*. Data are mean $\pm$ s.e.m. ( $n=3$ ). (g) Representative immunostaining detection of Sox17 on cytopinned F/A WT and Cripto KO cells, (scale bars, 75 $\mu$ m). Nuclei were stained with DAPI (blue).

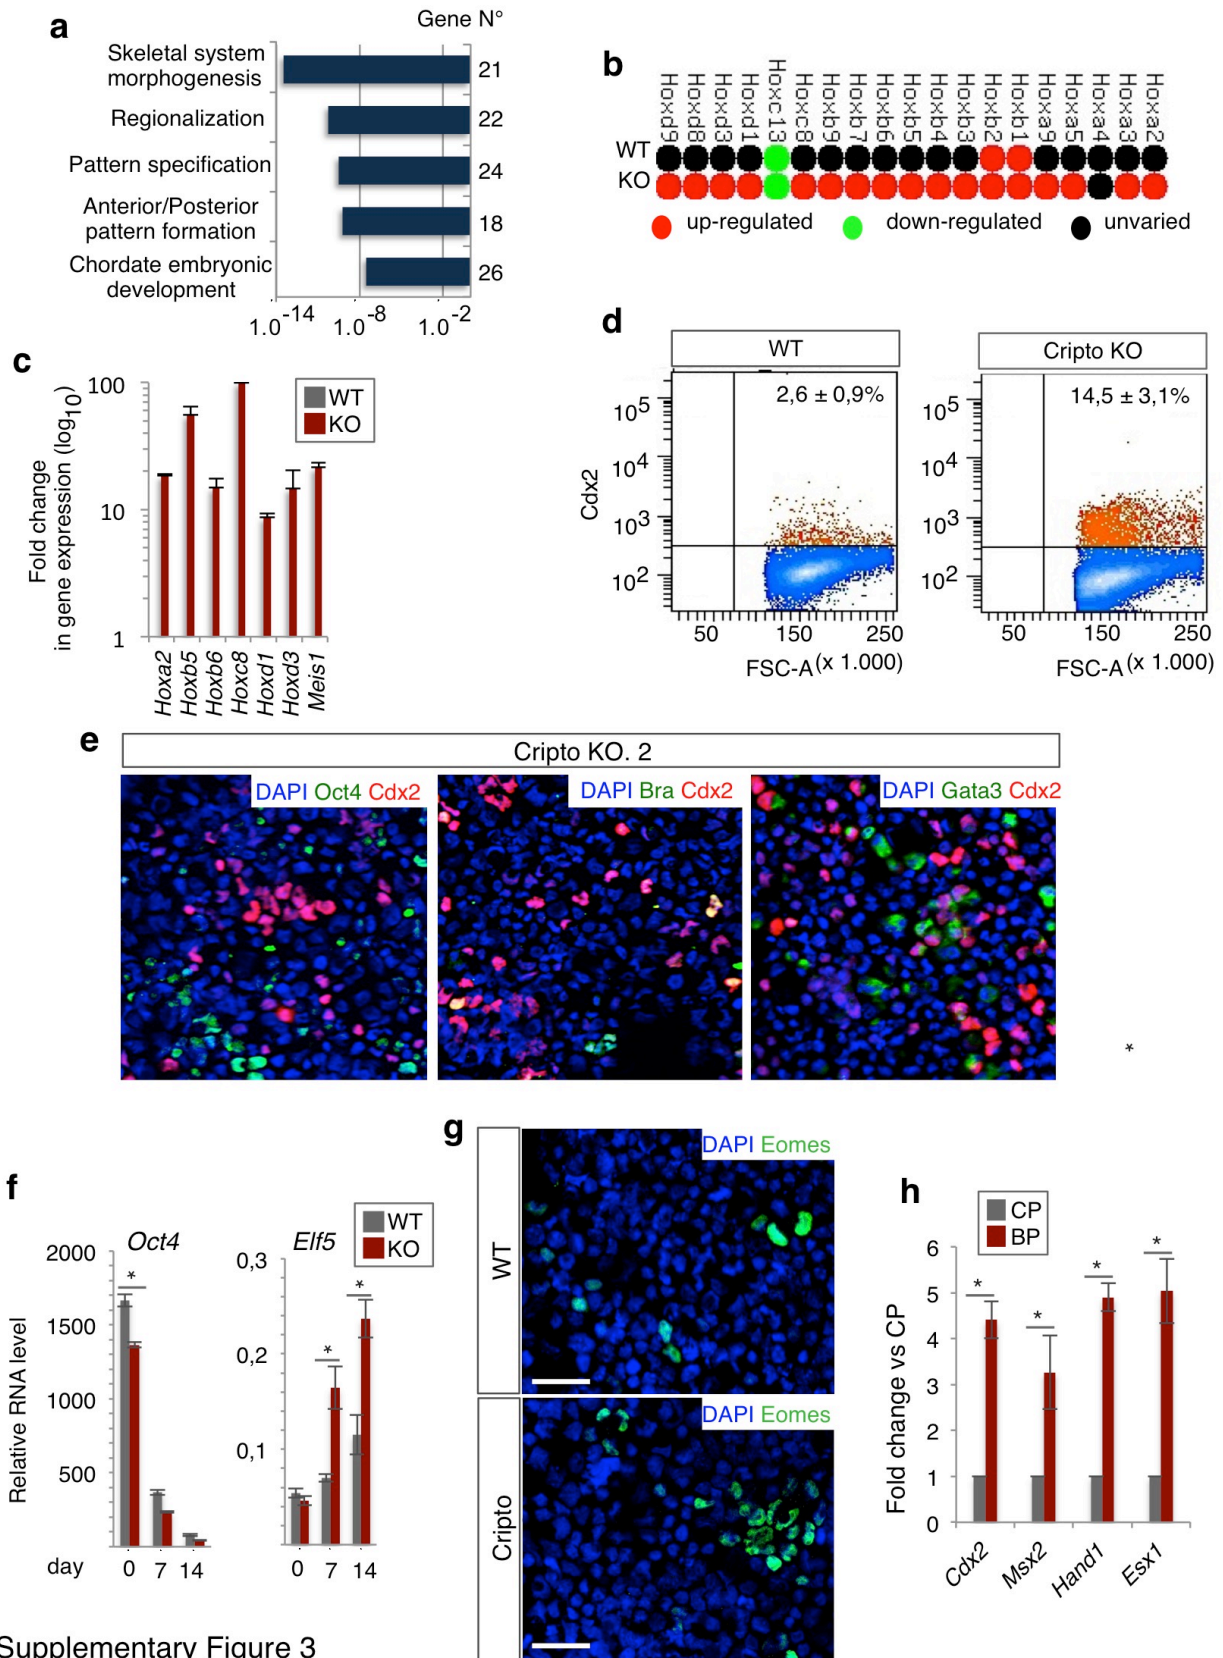

Supplementary Figure 3

### Supplementary Figure 3. Cripto deficiency attenuates ESC lineage restriction

(a) KEGG Pathway enrichment of genes (692) uniquely deregulated in Cripto KO ESC→EpiSC transition. (b) Heatmap of *Hox* cluster genes in WT and Cripto KO ESC→EpiSC transition. (c) Q-



PCR of *Hox* genes expression in F/A Cripto KO vs WT cells. Data are expressed as fold change after normalization to *Gapdh*. **(d)** FACS -based quantification of Cdx2 positive cells in F/A WT and Cripto KO TSC cultures. Data are as mean $\pm$ s.e.m. ( $n=2$ ). **(e)** Representative pictures of Oct4/Cdx2, Bra/Cdx2 and Gata3/Cdx2 double immunostaining of F/A WT and Cripto KO (clone KO.2) cytopinned cells. Nuclei were stained with DAPI. **(f)** Q-PCR of *Oct4* and *Elf5* expression at different time point during WT and Cripto KO ESC to Trophoblast Stem Cell (TSC) differentiation. Relative RNA level was normalised to *Gapdh*. Data are mean $\pm$ s.e.m. ( $n=3$ ;  $*P<0.01$ ). **(g)** Representative immunostaining detection of Eomes on cytopinned WT and Cripto KO cells (scale bars, 75 $\mu$ m). Nuclei were stained with DAPI. **(h)** Q-PCR of *Cdx2*, *Msx2*, *Hand1* and *Esx1* expression at day 6 of CP/BP-treated ESC $\rightarrow$ EpiSC transition. Data are expressed as fold change after normalization to *Gapdh*. Data are mean $\pm$ s.e.m. ( $n=3$ ;  $*P<0.01$ ).

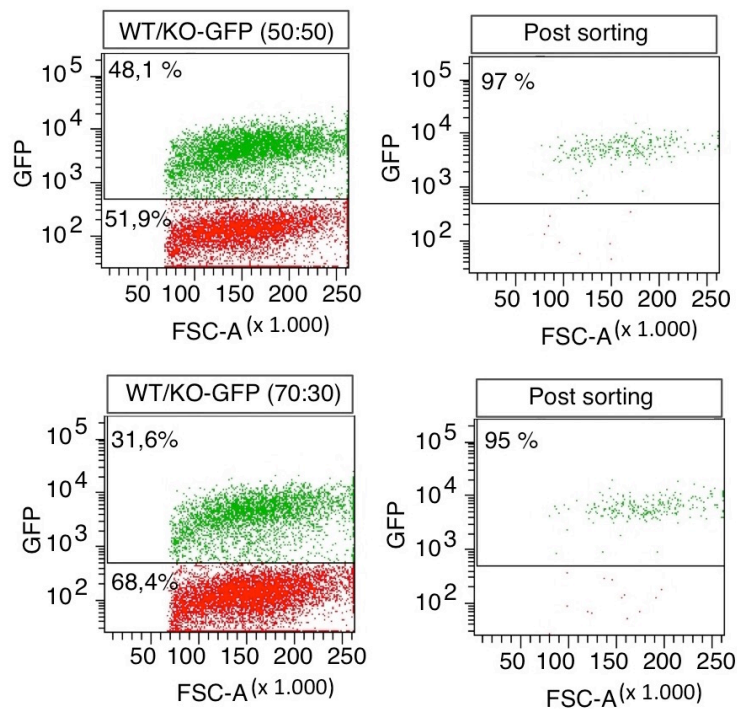

Supplementary Figure 4

**Supplementary Figure 4. Non-cell autonomous contribution of Cripto in ESC $\rightarrow$ EpiSC transition**

FACS-based separation of F/A WT and Cripto KO-GFP at 1:1 and 3:1 ratios and post-sorting control, respectively. Numbers are the percentage of total cells/gate.

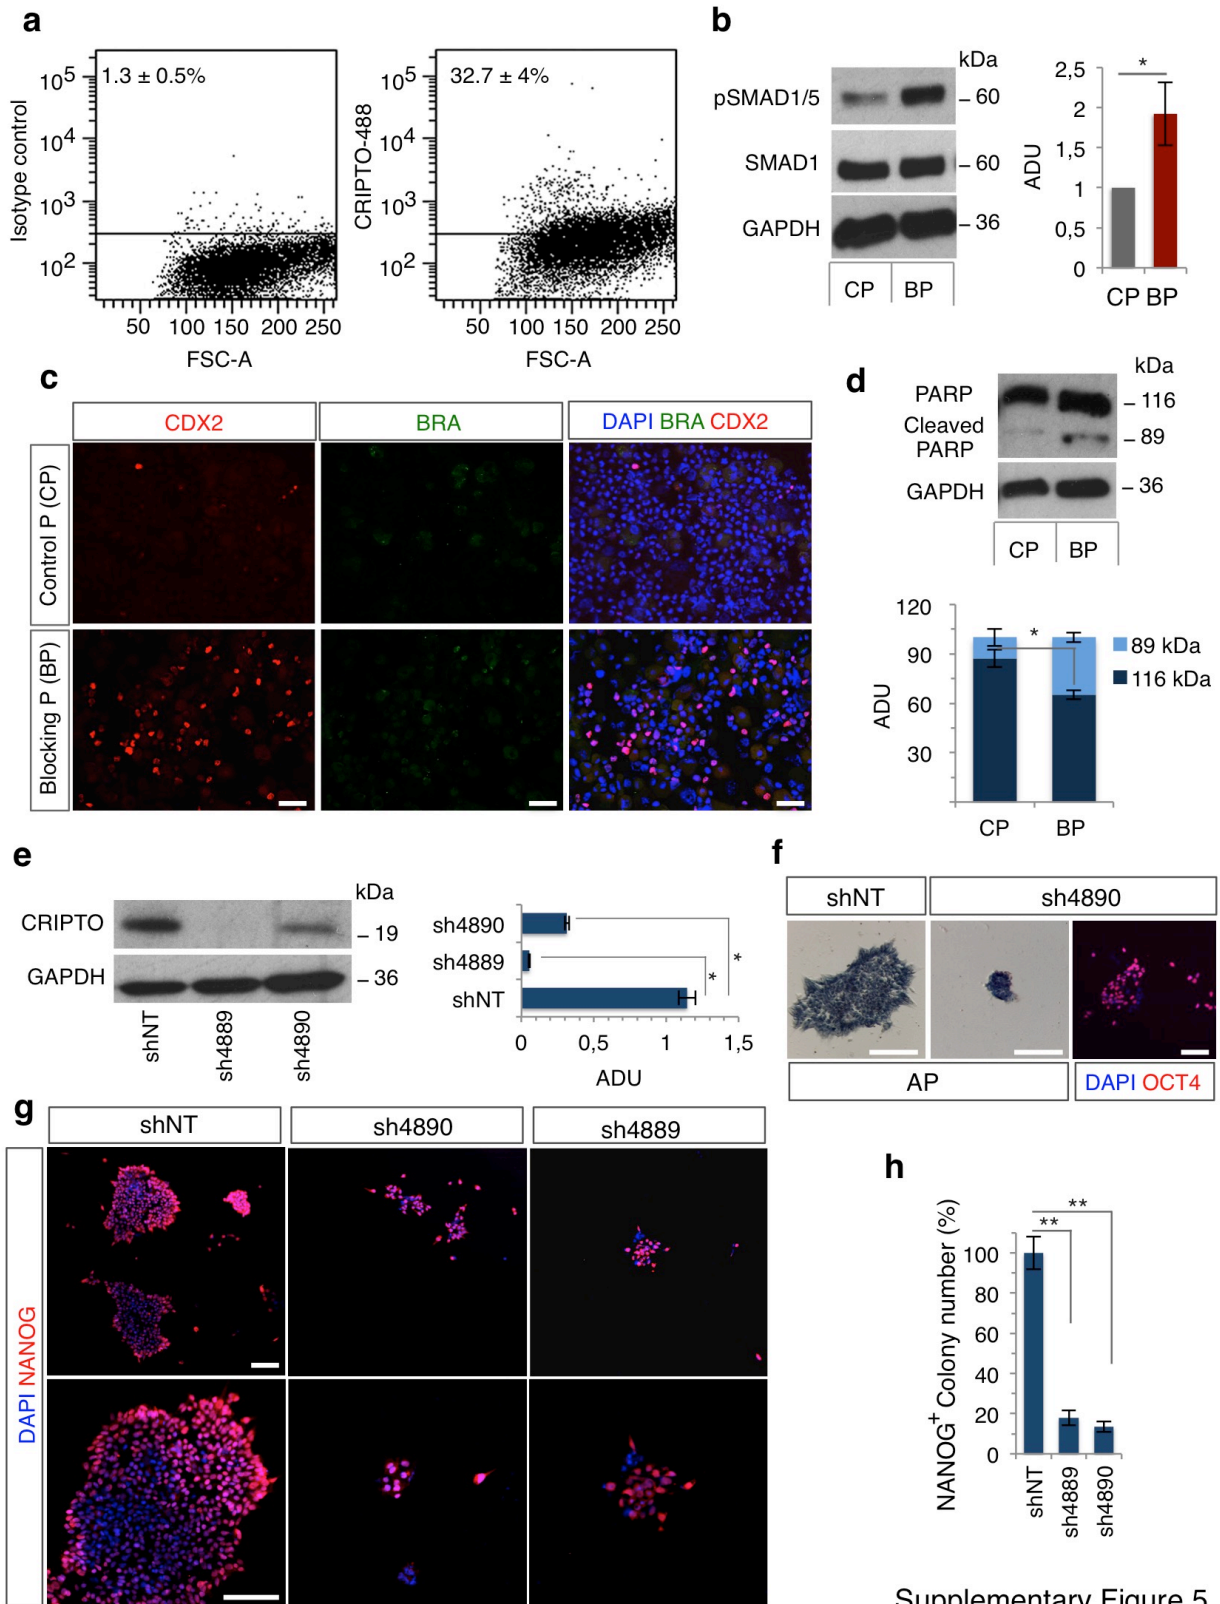

Supplementary Figure 5

**Supplementary Figure 5. Cripto regulates hESCs self-renewal.**

(a) FACS analysis of CRIPTO expression in hESCs. (b) Western blot analysis of pSMAD1/5 protein levels in CP- and BP- treated hESCs. SMAD1 and GAPDH antibodies were used as loading controls. The densitometric analysis is expressed in ADU as pSMAD1/5/SMAD1/5 ratio.

Data are mean±s.e.m. ( $n=2$ ;  $*P<0.01$ ). (c) Representative pictures of CDX2/BRA immunostaining in cytospinned hESCs after two passages in the presence of CP/BP (20  $\mu$ M). Nuclei were stained with DAPI (blue). Scale bars, 75 $\mu$ m. (d) Western blot analysis of the full-length form (116 kDa) and caspase-specific proteolytic fragment (89 kDa) of poly (ADP-ribose) polymerase (PARP). The densitometric analysis is expressed in ADU as the PARP/GAPDH ratio. (e) Generation of *CRIPTO* knock down hESC lines. Western blot analysis of *CRIPTO* protein levels in hESCs infected with shNT (control), sh4889 or sh4890 (targeting *CRIPTO*) lentiviruses. Densitometric analysis is expressed in ADU as *CRIPTO*/GAPDH ratio. Data are mean±s.e.m. ( $n=2$ ;  $*P<0.01$ ). (f) Representative photomicrographs of hESC colonies derived from shNT and sh4890 lentivirus-infected hESCs, and stained for Alkaline Phosphatase (AP) and/or DAPI. Nuclei are stained with DAPI. Scale bar, 200 $\mu$ m. (g) Representative immunofluorescence photomicrographs of hESC colonies derived from shNT Control, sh4890 and sh4889 *CRIPTO* KD hESCs stained for NANOG. Scale bar, 100 $\mu$ m. (h) Quantification of NANOG<sup>+</sup> colonies shown as percentage over shNT hESCs. Data are mean±s.e.m. ( $n=3$ ;  $**P<0.005$ ).



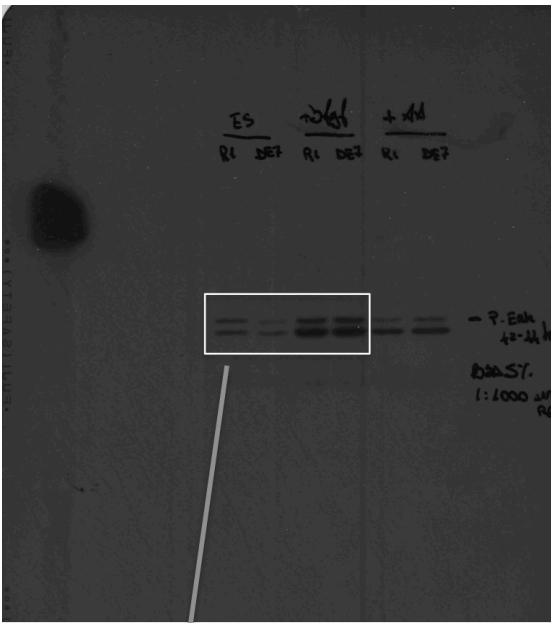

Figure 3 panel d  
(pErk1/2)

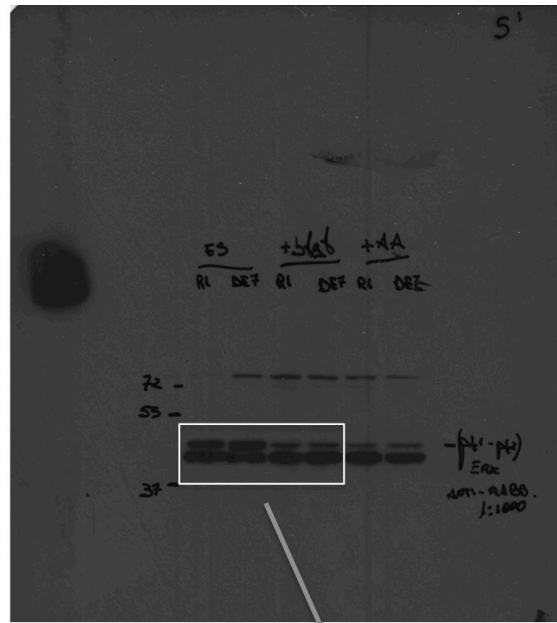

Figure 3 panel d  
(Erk1/2)

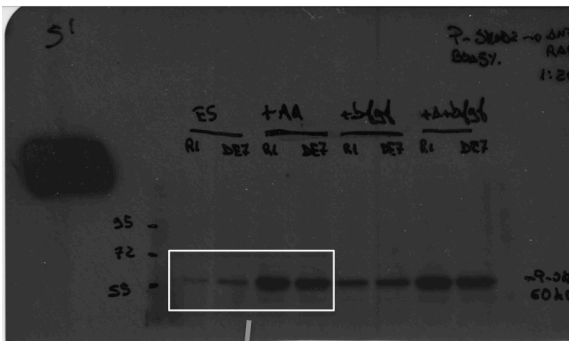

Figure 3 panel d  
(pSmad2)

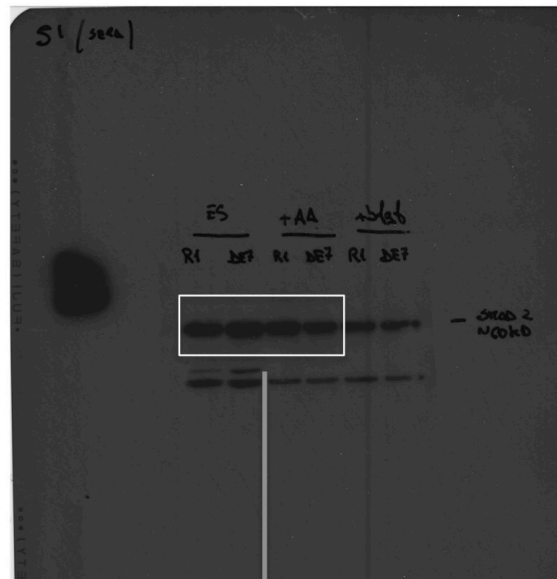

Figure 3 panel d  
(Smad2)

Figure 3

Supplementary Figure 6. Full blots for data shown in the main Figure 3

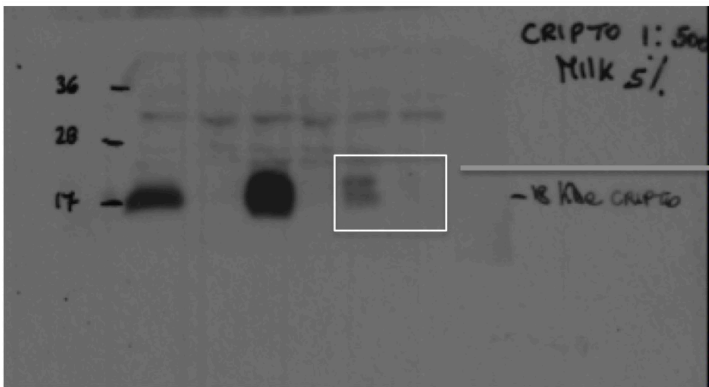

Figure 4 panel j  
(Cripto)

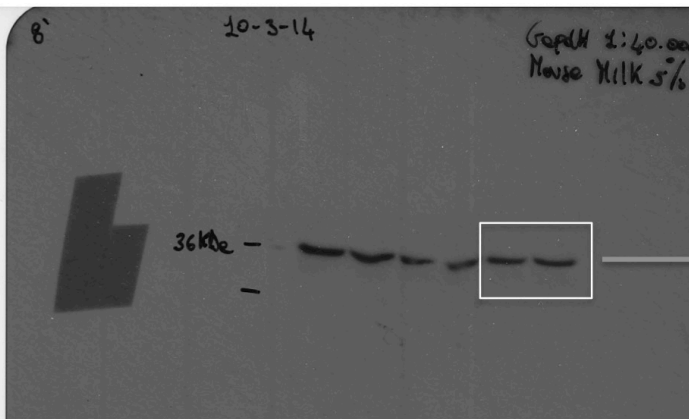

Figure 4 panel j  
(Gapdh)

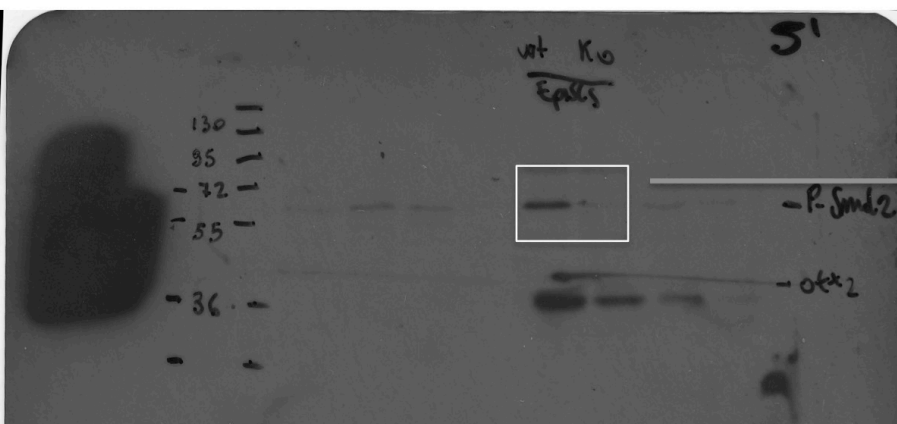

Figure 4 panel j  
(pSmad2)

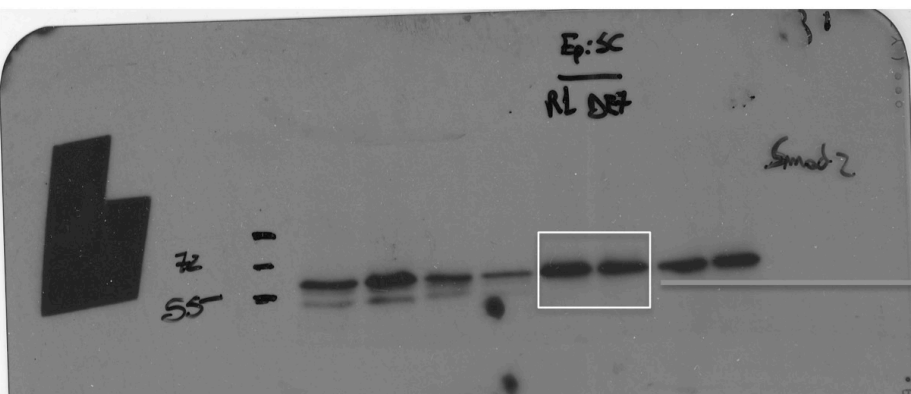

Figure 4 panel j  
(Smad2)

Figure 4

Supplementary Figure 6 (continued). Full blots for data shown in the main Figure 4

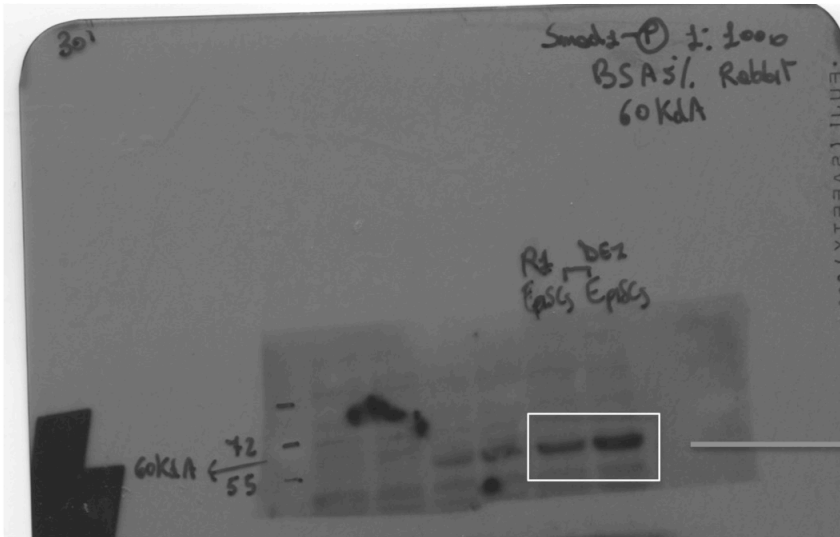

Figure 5 panel c  
(pSmad1/5)

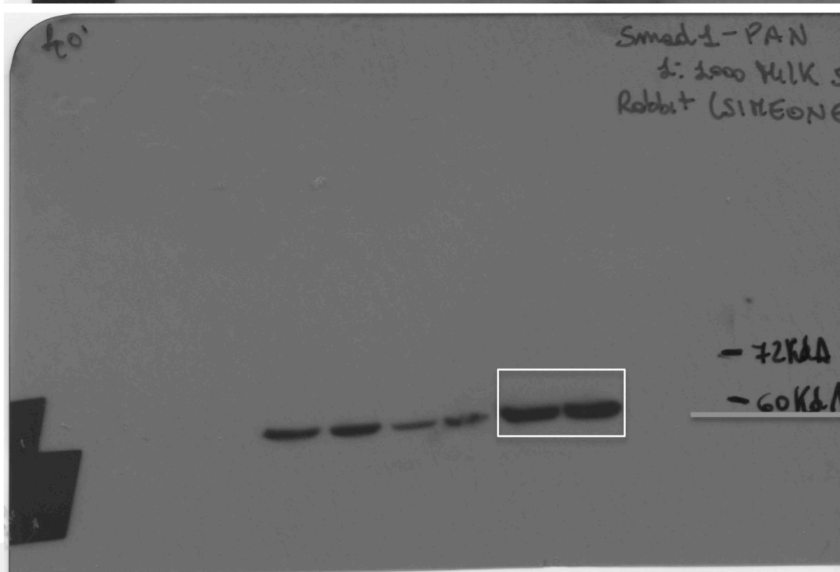

Figure 5 panel c  
(Smad1/5)

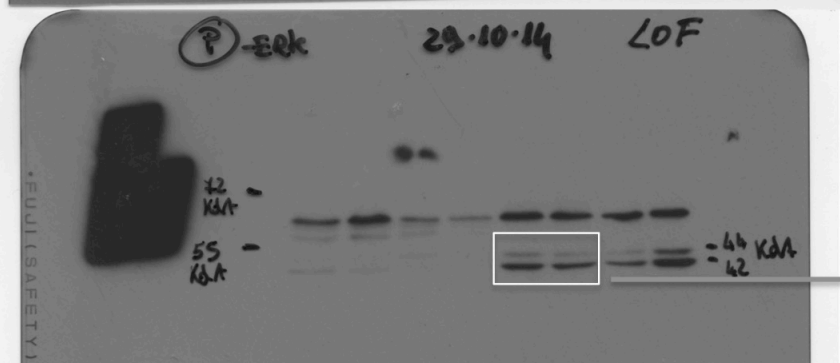

Figure 5 panel c  
(pErk1/2)

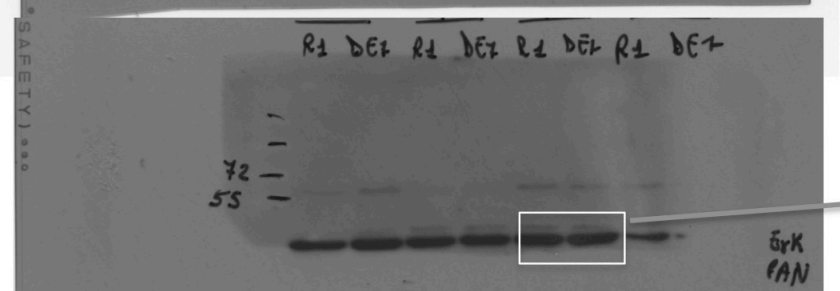

Figure 5 panel c  
(Erk1/2)

Figure 5

Supplementary Figure 6 (continued). Full blots for data shown in the main Figure 5

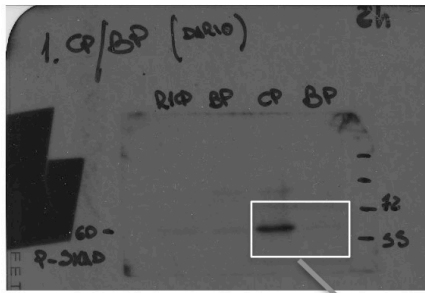

Figure 7 panel c  
(pSmad2)

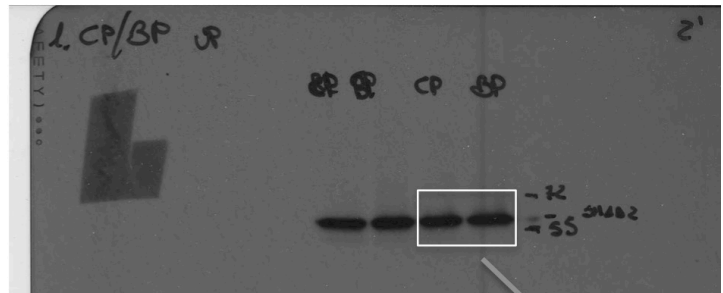

Figure 7 panel c  
(Smad2)

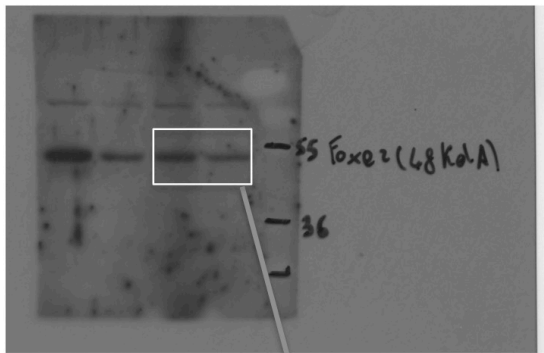

Figure 7 panel c  
(Foxa2)

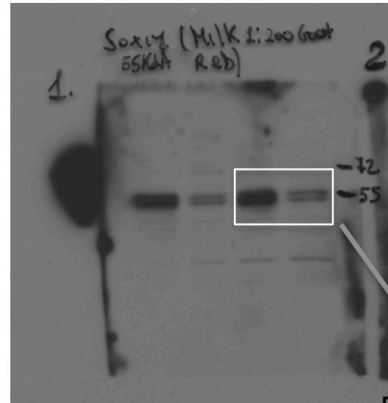

Figure 7 panel c  
(Sox17)

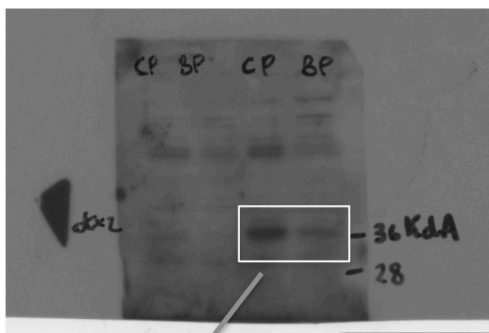

Figure 7 panel c  
(Otx2)

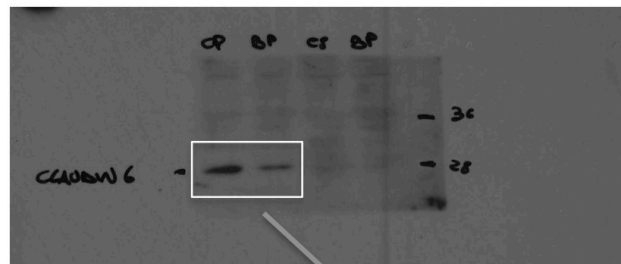

Figure 7 panel c  
(Claudin6)

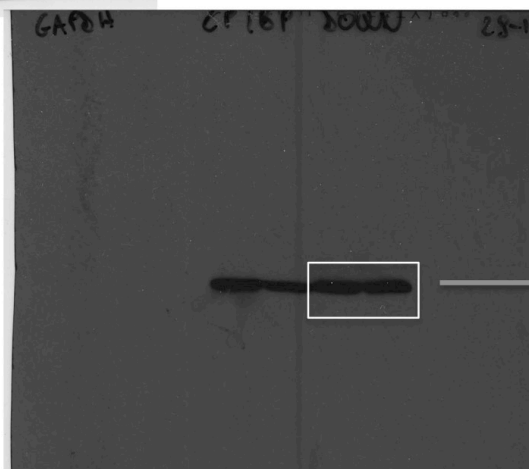

Figure 7 panel c  
(Gapdh)

Figure 7

Supplementary Figure 6 (continued). Full blots for data shown in the main Figure 7

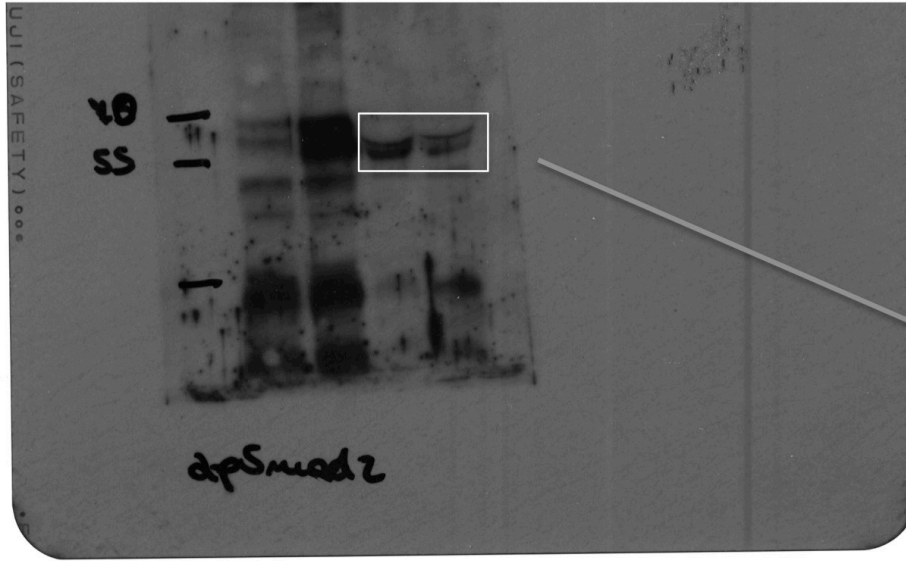

Figure 8 panel e  
(pSmad2)

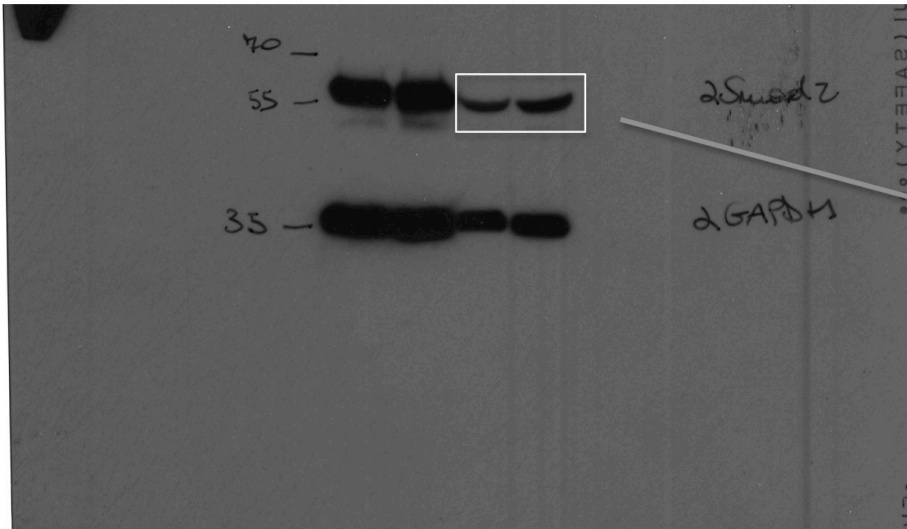

Figure 8 panel e  
(Smad2)

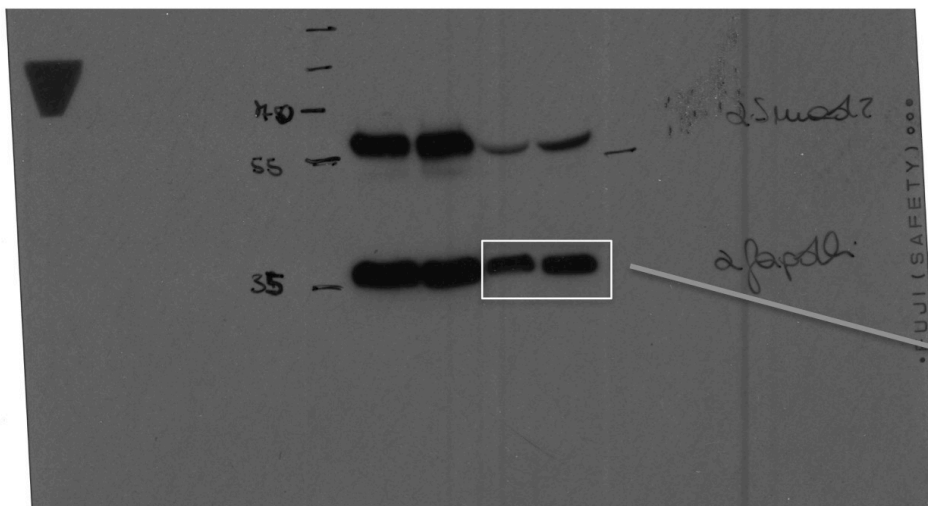

Figure 8 panel e  
(Gapdh)

Figure 8

Supplementary Figure 6 (continued). Full blots for data shown in the main Figure 8



## Supplementary Table 1

List of antibodies used throughout the study

| ANTIBODY               | SOURCE          | CAT. NO. | APPLICATION                            |
|------------------------|-----------------|----------|----------------------------------------|
| <b>mCripto -APC</b>    | R&D             | FAB1538A | FACS (10µl/1x10 <sup>6</sup> cells)    |
| <b>mCripto</b>         | Home Made       |          | IF (1 µg ml <sup>-1</sup> )            |
| <b>mCripto</b>         | R&D             | AF1538   | WB (1 µg ml <sup>-1</sup> )            |
| <b>hCripto -488</b>    | R&D             | AF1538   | IF (1 µg ml <sup>-1</sup> )            |
| <b>hCripto</b>         | R&D             | MAB2772  | WB (1 µg ml <sup>-1</sup> )            |
| <b>Phospho-Stat3</b>   | Cell Signaling  | 9145     | WB (1:2000)                            |
| <b>Stat3</b>           | Cell Signaling  | 3108     | WB (1:2000)                            |
| <b>Phospho-Smad1/5</b> | Cell Signaling  | 9516     | WB (1:1000)                            |
| <b>Smad1</b>           | Cell Signaling  | 9743     | WB (1:1000)                            |
| <b>Phospho-Erk1/2</b>  | Cell Signaling  | 9101     | WB (1:1000)                            |
| <b>Erk1/2</b>          | Cell Signaling  | 9102     | WB (1:1000)                            |
| <b>Phospho-Smad2</b>   | Cell Signaling  | 3108     | WB (1:200)                             |
| <b>Smad2</b>           | Cell Signaling  | 3103     | WB (1:1000)                            |
| <b>Nanog</b>           | Cell Signaling  | 8822     | IF (1:400)                             |
| <b>hNANOG</b>          | R&D             | AF1997   | IF on hESCs (1:20)                     |
| <b>Nanog</b>           | eBioscience     | 14-5761  | IF on mouse embryos                    |
| <b>Oct4</b>            | Santa Cruz B.T. | sc-8628  | IF (1:400 on mESCs;<br>1:100 on hESCs) |
| <b>Brachyury</b>       | Santa Cruz B.T. | sc-17745 | IF (1:200)                             |
| <b>Otx2</b>            | R&D             | AF1979   | IF (1:200) WB (1:500)                  |
| <b>Claudin6</b>        | Santa Cruz B.T. | sc-17669 | IF (1:200) WB (1:500)                  |
| <b>Foxa2</b>           | abcam           | ab40874  | IF (1:200) WB (1:500)                  |
| <b>Sox17</b>           | Santa Cruz B.T. | sc-17318 | IF (1:200) WB (1:500)                  |
| <b>Cdx2</b>            | abcam           | ab86949  | IF, FACS                               |
| <b>Gata3</b>           | Santa Cruz B.T. | sc-268   | IF (1:200)                             |
| <b>Mf20</b>            | Hybridoma Bank  |          | IHC (1:50)                             |
| <b>Nestin</b>          | Santa Cruz B.T. | sc-33677 | IHC (1:400)                            |
| <b>PARP</b>            | Cell Signaling  | 9542     | WB (1:1000)                            |
| <b>Pecam 1</b>         | R&D             | AF3628   | IF                                     |
| <b>Dab2</b>            | BD Biosciences  | 610464   | IF                                     |
| <b>βCatenin</b>        | BD Biosciences  | 610153   | WB(1.2000)                             |

|               |       |          |             |
|---------------|-------|----------|-------------|
| <b>GFP</b>    | abcam | ab6673   | IF (1:1000) |
| <b>PGC-1b</b> | abcam | ab176328 | IF (1:500)  |

## Supplementary Table 2

Sequences of qPCR primers

| GENE NAME        | FORWARD PRIMER          | REVERSE PRIMER           |
|------------------|-------------------------|--------------------------|
| <i>Cripto</i>    | TGTTTCGCAAAGAGCACTGTGG  | TGAGGTCCTGGTCCATCACTTGAC |
| <i>Gapdh</i>     | TGGGGGAAGCTTAAAGTGCAG   | GATGTAGGCAGCTGTCATTC     |
| <i>Stella</i>    | TTCCGAGCTAGCTTTTGAGG    | ACACCGGGGTTTAGGGTTAG     |
| <i>Nanog</i>     | AAGTACCTCAGCCTCCAGCA    | GTGCTGAGCCCTTCTGAATC     |
| <i>Esrrb</i>     | GGCCACCAATGAATGTGAG     | AGCCGTCGCTTGTACTTCTG     |
| <i>Oct3/4</i>    | TCAGCTTGGGCTAGAGAAGG    | TGACGGGAACAGAGGGAAAG     |
| <i>Lef1</i>      | GCAGCTATCAACCAGATCC     | GATGTAGGCAGCTGTCATTC     |
| <i>Brachyury</i> | GAACCTCGGATTCACATCGT    | TTCTTTGGCATCAAGGAAGG     |
| <i>Fgf5</i>      | CAAAGTCAATGGCTCCCACGAAG | CTACAATCCCCTGAGACACAGCA  |
| <i>Otx2</i>      | GGTATTGGACTTGCTGCATCC   | CGAGCTGTGCCCTGATAAATG    |
| <i>Lefty1</i>    | AGCTCAAGGCAATTGTGACC    | TCATCTCTGAGGCGACACAC     |
| <i>Cer1</i>      | AGGAGGAAGCCAAGAGGTTC    | CATTTGCCAAAGCAAAGGTT     |
| <i>Sox17</i>     | AGCTAAGCAAGATGCTAGGCAAG | TCTCTGCCAAGGTCAACGC      |
| <i>Dnmt3b</i>    | GCCAGCCTCACGACAGGAAAC   | GACTGGGGGTGAGGGAGCATC    |
| <i>Foxa2</i>     | ACCTGAGTCCGAGTCTGAGC    | TGTAGCTGCGTCCGTATGTC     |
| <i>Cdx2</i>      | AGGAAGCCAAGGTGAAAACCA   | CAGCCAGCTCACTTTTCCTC     |
| <i>Gata3</i>     | GGGCTACGGTGCAGAGGTAT    | TGGATGGACGTCTTGGAGAA     |
| <i>Msx2</i>      | CCTCGGTCAAGTCGGAAAAT    | GGTACTGTTTCTGGCGGAAC     |
| <i>Hand1</i>     | GGATGCACAAGCAGGTGAC     | GCGCCCTTTAATCCTCTTCT     |
| <i>Hoxa2</i>     | TCCCTGGATGAAGGAGAAGA    | GGTGTACGCGTTTCTCAGAC     |
| <i>Hoxb5</i>     | AGGGGCAGACTCCACAGATA    | GGGTCAGGTAGCGATTGAAG     |
| <i>Hoxb6</i>     | AAGAGCGTGTTCCGAGAGAC    | CAGGGTCTGGTAGCGTGTGT     |
| <i>Hoxc8</i>     | GTCTCCAGCCTCATGTTTC     | GGGCGTGAGAGACTTCAATC     |
| <i>Hoxd1</i>     | CAGCACTTTCGAGTGGATGA    | GCTCTGTCAGTTGCTTGGTG     |
| <i>Hoxd3</i>     | CAAACAGATCTTCCCCTGGA    | ACCAGCTGAGCACTCGTGTA     |
| <i>Meis1</i>     | GCCAATGGGAGGTTTTGTAA    | GCATCTGGGCTTGGGTATAA     |
| <i>Pgcb</i>      | GTGCCAGGTGCTGACGAGAA    | AGTGTATCTGGGCCAACGGAA    |
| <i>Cox7a1</i>    | GTGGCAGAGAAGCAGAAGCTC   | CCAGCCCAAGCAGTATAAGCAGT  |
| <i>Eomes</i>     | GGCAAAGCGGACAATAACAT    | AGCCTCGGTTGGTATTTGTG     |
| <i>Tead4</i>     | GCACCATTACCTCCAACGAG    | GATCAGCTCATTCCGACCAT     |

***Elf5***

GGACCGATCTGTTCAAGCAAT

CTTGACTGGTCGCAGCAGA
